# Supplementary material for: Criterion-related validity and reliability of the Urdu version of the patient health questionnaire in a sample of community-based pregnant women in Pakistan
Source: PeerJ. 2018 Jul 17;6:e5185. doi: 10.7717/peerj.5185 (PMC6054083; doi:10.7717/peerj.5185)
Supplement: Supplemental Information 5 [file peerj-06-5185-s005.xlsx]

## Sheet: Sheet1
Variable	Label	Levels
anon_id	Participant Identifier
baselineSampel	In Baseline Sample	0 = No; 1 = Yes
phq1	PHQ item 1: Feeling tired or having little energy	0 = Not at all; 1 = Several days; 2 = More than half the days; 3 = Nearly every day
phq2	PHQ item 2: Poor appetite or overeating	0 = Not at all; 1 = Several days; 2 = More than half the days; 3 = Nearly every day
phq3	PHQ item 3: Trouble falling or staying asleep, or sleeping too much	0 = Not at all; 1 = Several days; 2 = More than half the days; 3 = Nearly every day
phq4	PHQ item 4: Moving/speaking so slowly that other people have noticed; or the opposite	0 = Not at all; 1 = Several days; 2 = More than half the days; 3 = Nearly every day
phq5	PHQ item 5: Troiuble concentrating on things	0 = Not at all; 1 = Several days; 2 = More than half the days; 3 = Nearly every day
phq6	PHQ item 6: Little interest or pleasure in doing things	0 = Not at all; 1 = Several days; 2 = More than half the days; 3 = Nearly every day
phq7	PHQ item 7: Feeling down, depressed, or hopeless	0 = Not at all; 1 = Several days; 2 = More than half the days; 3 = Nearly every day
phq8	PHQ item 8: Feeling bad about yourself or that you are a failure	0 = Not at all; 1 = Several days; 2 = More than half the days; 3 = Nearly every day
phq9	PHQ item 9: Thoughts that you would be better off dead, or hurting yourself	0 = Not at all; 1 = Several days; 2 = More than half the days; 3 = Nearly every day
phqTotal	Total PHQ-9 score (sum of items 1-9)
phqDichot10	PHQ-9 score dichotomized at 10	0 = < 10; 1 = >=10
phqCat	Severity of depression (PHQ-9 score)	0 = Minimal, 0-4; 1 = Mild, 5-9; 2 = Moderate, 10-14; 3 = Moderately severe, 15-19; 4 = Severe, 20+
scid	SCID: Current major depressive episode	0 = No; 1 = Yes
